# Supplementary material for: Highly enhanced electrochemiluminescence based on pseudo triple-enzyme cascade catalysis and in situ generation of co-reactant for thrombin detection
Source: Royal Society of Chemistry journal article supplement (doi:10.1039/c3an02134c), 2013-12-05
Supplement: c3an02134c.pdf [file c3an02134c.pdf]

*Electronic Supplementary Information*

## **Highly enhanced electrochemiluminescence based on pseudo triple-enzyme cascade catalysis and in situ generate co-reactant for thrombin detection**

Lijuan Xiao, Yaqin Chai<sup>\*</sup>, Ruo Yuan<sup>\*</sup>, Haijun Wang and Lijuan Bai

*Education Ministry Key Laboratory on Luminescence and Real-Time Analysis,*

*College of Chemistry and Chemical Engineering, Chongqing 400715, People's*

*Republic of China*

***The UV-vis spectra and TEM of the as-prepared gold nanorods***

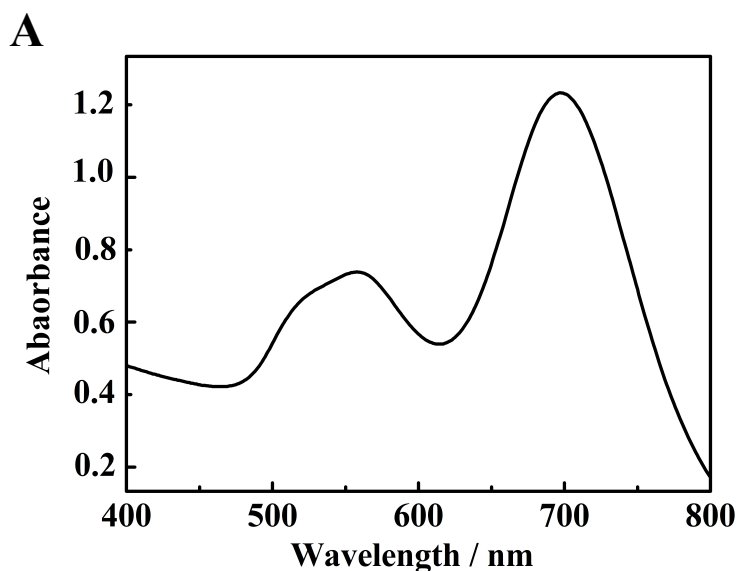

---

<sup>\*</sup> Corresponding author. Tel.: +86-23-68252277; Fax: +86-23-68253172.

E-mail address: [yqchai@swu.edu.cn](mailto:yqchai@swu.edu.cn) (Y. Q. Chai), [yuanruo@swu.edu.cn](mailto:yuanruo@swu.edu.cn) (R. Yuan)

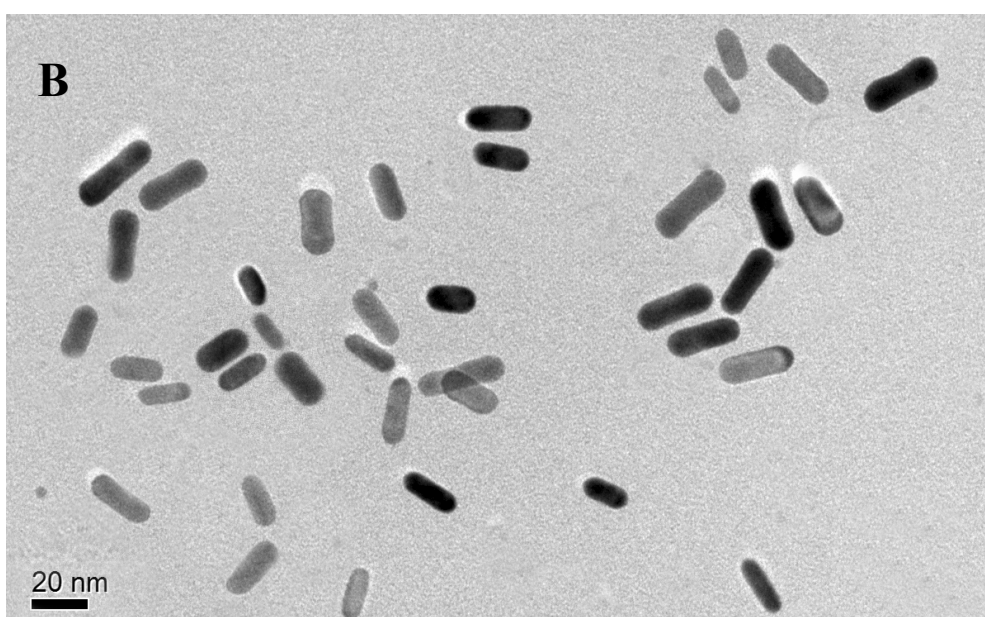

**Fig. S1** UV-vis spectra (A) and TEM (B) of the as-prepared gold nanorods.

### *The analytical properties of different TB assays*

The analytical performance of the proposed aptasensor has been compared with those of other detection methodologies reported in the literatures. The results were list in Table S1. As seen from the table, the fabrication time of other methods made little difference, but under this condition we gained the good linear range and detection limit. As a result, the time for fabricating this aptasensor was proper and this method was applicable for hospital applications.

**Table S1**

| Detection method | Linear range (nM) | Detection limit (pM) | Fabrication time (h) | Ref. |
|------------------|-------------------|----------------------|----------------------|------|
| CV               | 0.12~ 46          | 40                   | 20.17                | 1    |
| DPV              | 0.001~30          | 0.39                 | 18.75                | 2    |
| DPV              | 0.0005~20         | 0.15                 | 18                   | 3    |
| EIS              | 0.5~500           | ----                 | ----                 | 4    |
| QCM              | 50~200            | ----                 | ----                 | 5    |

|     |            |       |      |          |
|-----|------------|-------|------|----------|
| SPR | 0.1~150    | ----  | ---- | 6        |
| ECL | 0.0005~0.8 | 0.35  | 20   | 7        |
| ECL | 0.0001~50  | 0.033 | 18   | Our work |

**Abbreviation:** cyclic voltammetry (CV); differential pulse voltammetry (DPV); electrochemical impedance spectroscopy (EIS); quartz crystal microbalance (QCM); surface plasmon resonance (SPR); electrochemiluminescent (ECL).

## Reference

1. Y. L. Yuan, R. Yuan, Y. Q. Chai, Y. Zhuo, Z. Y. Liu, L. Mao, S. Guan and X. Q. Qian, *Anal. Chim. Acta.*, 2010, 668, 171.
2. L. J. Bai, R. Yuan, Y. Q. Chai, Y. L. Yuan, Y. Zhuo and L. Mao, *Biosens. Bioelectron.*, 2011, 26, 4331.
3. Y.L. Yuan, R. Yuan, Y.Q. Chai, Y. Zhuo, X.Y. Ye, X.X. Gan and L.J. Bai, *Chem. Commun.*, 2012, 48, 4621.
4. J. A. Lee, S. Hwang, J. Kwak, S. Park, S. S. Lee and K. C. Lee, *Sens. Actuators, B*, 2008, 129, 372.
5. A. Bini, M. Minunni, S. Tombelli, S. Centi and M. Mascini, *Anal. Chem.*, 2007, 79, 3016.
6. C. Polonschiia, S. Davida, S. Tombellib, M. Mascinib and M. Gheorghiu, *Talanta*, 2010, 80, 2157.
7. Y. Chen, B. Y. Jiang, Y. Xiang, Y. Q. Chai and R. Yuan, *Chem. Commun.*, 2011, 47, 7758.
